# Supplementary material
Source: MDPI journal article supplement (https://www.mdpi.com/2073-4395/11/11/2192)
Supplement: s1 [file s1]

**Supplement 1 Table S1.** SCAR markers of *Rpi*-genes in F1 progeny and parental lines

| Genotypes | <i>Genes /SCAR markers</i> |                    |        |              |          |            |                             |         |                   |                |
|-----------|----------------------------|--------------------|--------|--------------|----------|------------|-----------------------------|---------|-------------------|----------------|
|           | <i>R1</i>                  | <i>R2=Rpi-blb3</i> |        | <i>R3a</i>   |          | <i>R3b</i> | <i>Rpi-blb 1 = Rpi-sto1</i> |         | <i>Rpi-vnt1.3</i> |                |
|           | R1-1205                    | R2-1137            | R2-686 | Rpi-blb3-305 | R3a-1380 | R3b-378    | RB-226                      | Blb-821 | Rpi-sto1-890      | Rpi-vnt1.3-616 |
| 13/11-09  | 0                          | 0                  | 0      | 0            | 0        | 1          | 1                           | 1       | 1                 | 1              |
| Сударыня  | 0                          | 1                  | 1      | 0            | 1        | 1          | 1                           | 1       | 1                 | 0              |
| 952-1     | 0                          | 0                  | 0      | 0            | 0        | 0          | 0                           | 0       | 0                 | 0              |
| 952-2     | 0                          | 0                  | 0      | 0            | 1        | 1          | 1                           | 1       | 1                 | 0              |
| 952-3     | 0                          | 0                  | 0      | 0            | 0        | 1          | 1                           | 1       | 1                 | 0              |
| 952-4     | 0                          | 0                  | 0      | 0            | 1        | 1          | 1                           | 1       | 1                 | 0              |
| 952-5     | 0                          | 0                  | 0      | 0            | 0        | 1          | 1                           | 1       | 1                 | 1              |
| 952-6     | 0                          | 0                  | 1      | 0            | 0        | 1          | 0                           | 0       | 0                 | 0              |
| 952-7     | 0                          | 0                  | 0      | 0            | 0        | 1          | 0                           | 0       | 0                 | 1              |
| 952-8     | 0                          | 0                  | 1      | 0            | 0        | 1          | 1                           | 1       | 1                 | 1              |
| 952-9     | 0                          | 0                  | 0      | 0            | 1        | 1          | 1                           | 1       | 1                 | 0              |
| 952-10    | 0                          | 0                  | 0      | 0            | 0        | 1          | 1                           | 0       | 0                 | 0              |
| 952-12    | 0                          | 0                  | 0      | 0            | 0        | 1          | 1                           | 1       | 1                 | 0              |
| 952-13    | 0                          | 0                  | 0      | 0            | 0        | 0          | 0                           | 0       | 0                 | 0              |
| 952-14    | 0                          | 0                  | 0      | 0            | 0        | 1          | 0                           | 0       | 0                 | 1              |
| 925-15    | 0                          | 0                  | 0      | 0            | 0        | 1          | 0                           | 0       | 0                 | 0              |

| Genotypes | <i>Genes /SCAR markers</i> |                    |        |              |          |            |                             |         |              |                   |
|-----------|----------------------------|--------------------|--------|--------------|----------|------------|-----------------------------|---------|--------------|-------------------|
|           | <i>R1</i>                  | <i>R2=Rpi-blb3</i> |        | <i>R3a</i>   |          | <i>R3b</i> | <i>Rpi-blb 1 = Rpi-sto1</i> |         |              | <i>Rpi-vnt1.3</i> |
|           | R1-1205                    | R2-1137            | R2-686 | Rpi-blb3-305 | R3a-1380 | R3b-378    | RB-226                      | Blb-821 | Rpi-sto1-890 | Rpi-vnt1.3-616    |
| 952-16    | 0                          | 0                  | 0      | 0            | 0        | 1          | 1                           | 1       | 1            | 0                 |
| 952-17    | 0                          | 0                  | 1      | 0            | 0        | 0          | 1                           | 0       | 0            | 1                 |
| 952-18    | 0                          | 0                  | 0      | 0            | 0        | 0          | 0                           | 0       | 0            | 0                 |
| 952-19    | 0                          | 1                  | 1      | 0            | 1        | 1          | 1                           | 1       | 1            | 0                 |
| 952-20    | 0                          | 0                  | 0      | 0            | 0        | 0          | 1                           | 1       | 1            | 1                 |
| 952-21    | 0                          | 0                  | 1      | 0            | 1        | 1          | 1                           | 1       | 1            | 0                 |
| 952-22    | 0                          | 0                  | 0      | 0            | 0        | 1          | 1                           | 1       | 1            | 0                 |
| 952-23    | 0                          | 0                  | 0      | 0            | 1        | 1          | 1                           | 1       | 1            | 0                 |
| 952-24    | 0                          | 0                  | 0      | 0            | 1        | 1          | 1                           | 1       | 1            | 0                 |
| 952-25    | 0                          | 0                  | 0      | 0            | 0        | 1          | 0                           | 0       | 0            | 1                 |
| 952-26    | 0                          | 1                  | 1      | 0            | 0        | 1          | 1                           | 1       | 1            | 1                 |
| 952-27    | 0                          | 0                  | 0      | 0            | 0        | 0          | 1                           | 1       | 1            | 0                 |
| 952-28    | 0                          | 0                  | 1      | 0            | 0        | 0          | 0                           | 0       | 0            | 0                 |
| 952-29    | 0                          | 0                  | 1      | 0            | 0        | 1          | 1                           | 1       | 1            | 0                 |
| 952-30    | 0                          | 0                  | 0      | 0            | 1        | 1          | 1                           | 1       | 1            | 0                 |
| 952-31    | 0                          | 0                  | 0      | 0            | 1        | 1          | 1                           | 1       | 1            | 0                 |
| 952-32    | 0                          | 0                  | 0      | 0            | 0        | 1          | 1                           | 1       | 1            | 0                 |

| Genotypes | <i>Genes /SCAR markers</i> |                    |        |              |          |            |                             |         |              |                   |
|-----------|----------------------------|--------------------|--------|--------------|----------|------------|-----------------------------|---------|--------------|-------------------|
|           | <i>R1</i>                  | <i>R2=Rpi-blb3</i> |        | <i>R3a</i>   |          | <i>R3b</i> | <i>Rpi-blb 1 = Rpi-sto1</i> |         |              | <i>Rpi-vnt1.3</i> |
|           | R1-1205                    | R2-1137            | R2-686 | Rpi-blb3-305 | R3a-1380 | R3b-378    | RB-226                      | Blb-821 | Rpi-sto1-890 | Rpi-vnt1.3-616    |
| 952-33    | 0                          | 1                  | 0      | 0            | 1        | 1          | 1                           | 1       | 1            | 0                 |
| 952-35    | 0                          | 0                  | 1      | 0            | 1        | 1          | 1                           | 0       | 1            | 1                 |
| 952-36    | 0                          | 1                  | 0      | 0            | 1        | 1          | 1                           | 1       | 1            | 0                 |
| 952-37    | 0                          | 1                  | 1      | 0            | 0        | 0          | 1                           | 1       | 1            | 0                 |
| 952-38    | 0                          | 0                  | 0      | 0            | 0        | 0          | 1                           | 1       | 1            | 0                 |
| 952-39    | 0                          | 1                  | 0      | 0            | 1        | 1          | 0                           | 0       | 0            | 0                 |
| 952-40    | 0                          | 0                  | 1      | 0            | 1        | 1          | 0                           | 0       | 0            | 0                 |
| 952-41    | 0                          | 1                  | 1      | 0            | 0        | 1          | 1                           | 1       | 1            | 0                 |
| 952-42    | 0                          | 0                  | 0      | 0            | 0        | 1          | 1                           | 1       | 1            | 0                 |
| 952-43    | 0                          | 1                  | 1      | 0            | 0        | 1          | 1                           | 1       | 1            | 0                 |
| 952-44    | 0                          | 0                  | 0      | 0            | 0        | 1          | 1                           | 1       | 1            | 0                 |
| 952-45    | 0                          | 1                  | 0      | 0            | 0        | 1          | 1                           | 1       | 1            | 0                 |
| 952-46    | 0                          | 0                  | 0      | 0            | 1        | 1          | 0                           | 0       | 0            | 0                 |
| 952-47    | 0                          | 0                  | 0      | 0            | 0        | 0          | 1                           | 1       | 1            | 0                 |
| 952-49    | 0                          | 0                  | 0      | 0            | 0        | 1          | 0                           | 0       | 0            | 1                 |
| 952-50    | 0                          | 0                  | 0      | 0            | 1        | 1          | 0                           | 0       | 0            | 0                 |
| 952-51    | 0                          | 0                  | 0      | 0            | 1        | 1          | 0                           | 0       | 0            | 0                 |

| Genotypes | <i>Genes /SCAR markers</i> |                    |        |              |          |            |                             |         |              |                   |
|-----------|----------------------------|--------------------|--------|--------------|----------|------------|-----------------------------|---------|--------------|-------------------|
|           | <i>R1</i>                  | <i>R2=Rpi-blb3</i> |        | <i>R3a</i>   |          | <i>R3b</i> | <i>Rpi-blb 1 = Rpi-sto1</i> |         |              | <i>Rpi-vnt1.3</i> |
|           | R1-1205                    | R2-1137            | R2-686 | Rpi-blb3-305 | R3a-1380 | R3b-378    | RB-226                      | Blb-821 | Rpi-sto1-890 | Rpi-vnt1.3-616    |
| 952-52    | 0                          | 1                  | 1      | 0            | 1        | 1          | 0                           | 0       | 0            | 0                 |
| 952-54    | 0                          | 0                  | 0      | 0            | 1        | 1          | 1                           | 1       | 1            | 0                 |
| 952-55    | 0                          | 0                  | 0      | 0            | 0        | 1          | 1                           | 0       | 0            | 1                 |
| 952-56    | 0                          | 0                  | 0      | 0            | 0        | 0          | 1                           | 1       | 1            | 0                 |
| 952-57    | 0                          | 1                  | 1      | 0            | 1        | 1          | 1                           | 1       | 1            | 1                 |
| 952-58    | 0                          | 1                  | 1      | 0            | 0        | 0          | 1                           | 1       | 0            | 0                 |
| 952-59    | 0                          | 0                  | 0      | 0            | 1        | 1          | 1                           | 1       | 1            | 0                 |
| 952-60    | 0                          | 0                  | 0      | 0            | 0        | 1          | 1                           | 1       | 1            | 0                 |
| 952-61    | 0                          | 0                  | 0      | 0            | 1        | 1          | 0                           | 1       | 0            | 0                 |
| 952-62    | 0                          | 0                  | 1      | 0            | 1        | 1          | 1                           | 1       | 1            | 0                 |
| 952-63    | 0                          | 0                  | 0      | 0            | 1        | 1          | 1                           | 1       | 1            | 0                 |
| 952-64    | 0                          | 1                  | 1      | 0            | 0        | 0          | 1                           | 1       | 1            | 1                 |
| 952-65    | 0                          | 1                  | 1      | 0            | 1        | 1          | 1                           | 1       | 1            | 0                 |
| 952-66    | 0                          | 0                  | 0      | 0            | 1        | 1          | 1                           | 1       | 1            | 0                 |
| 952-67    | 0                          | 1                  | 1      | 0            | 0        | 1          | 0                           | 0       | 0            | 1                 |
| 952-69    | 0                          | 0                  | 1      | 0            | 0        | 1          | 1                           | 1       | 1            | 0                 |

**Figure S1.** Alignment of *Rpi-vnt1* homologs and predicted amino acid sequences of *Rpi-vnt1* protein homologs

|                            |       |                                                                                                        |  |                                                      |
|----------------------------|-------|--------------------------------------------------------------------------------------------------------|--|------------------------------------------------------|
|                            |       | 3                                                                                                      |  | 102                                                  |
| CP047560_59492023-59491423 | (1)   | TTCCTCATCCTCACATTTAGAAAAAGAAATTTAAAGAAATTTAAAGGATGATGGCTGAAATTTCTCTACAGCAGTCATCAATAAATCAATAGAAATAG     |  |                                                      |
| GU338312_89-700            | (3)   | TTCCTCATCCTCACATTTAGAAAAAGAAATTTAAAGAAATTTAAAGGATGATGCTGATATTCTTCTACAGCAGTCATCAATAAATCAATAGAAATAG      |  |                                                      |
| Hybrid_13/11               | (1)   | TTCCTCATCCTCACATTTAGAAAAAGAAATTTAAAGAAATTTAAAGGATGATGCTGATATTCTTCTACAGCAGTCATCAATAAATCAATAGAAATAG      |  |                                                      |
| FJ423044_758-1367          | (1)   | TTCCTCATCCTCACATTTAGAAAAAGAAATTTAAAGAAATTTAAAGGATGATGGCTGAAATTTCTCTACAGCAGTCATCAATAAATCAATAGAAATAG     |  |                                                      |
| FJ423046_91-700            | (1)   | TTCCTCATCCTCACATTTAGAAAAAGAAATTTAAAGAAATTTAAAGGATGATGGCTGAAATTTCTCTACAGCAGTCATCAATAAATCAATAGAAATAG     |  |                                                      |
| MH297492_51-660            | (1)   | TTCCTCATCCTCACATTTAGAAAAAGAAATTTAAAGAAATTTAAAGGATGATGGCTGAAATTTCTCTACAGCAGTCATCAATAAATCAATAGAAATAG     |  |                                                      |
| Consensus                  | (3)   | TTCCTCATCCTCACATTTAGAAAAAGAAATTTAAAGAAATTTAAAGGATGATGGCTGAAATTTCTCTACAGCAGTCATCAATAAATCAATAGAAATAG     |  |                                                      |
|                            |       | 103                                                                                                    |  | 202                                                  |
| CP047560_59492023-59491423 | (96)  | CTGCAAAATCTACTCTTTCAAGAAGGTACCGCGTTTATATTGGTTGAAAGAGGACATCGATTGGCTCCAGAGAGAAATGAGACACATTCGATCATATGTAGA |  |                                                      |
| GU338312_89-700            | (103) | CTGCAAAATCTACTCTTTCAAGAAGGTACCGCGTTTATATTGGTTGAAAGAGGACATCGATTGGCTCCAGAGAGAAATGAGACACATTCGATCATATGTAGA |  |                                                      |
| Hybrid_13/11               | (101) | CTGCAAAATCTACTCTTTCAAGAAGGTACCGCGTTTATATTGGTTGAAAGAGGACATCGATTGGCTCCAGAGAGAAATGAGACACATTCGATCATATGTAGA |  |                                                      |
| FJ423044_758-1367          | (103) | CTGCAAAATCTACTCTTTCAAGAAGGTACCGCGTTTATATTGGTTGAAAGAGGACATCGATTGGCTCCAGAGAGAAATGAGACACATTCGATCATATGTAGA |  |                                                      |
| FJ423046_91-700            | (101) | CTGCAAAATCTACTCTTTCAAGAAGGTACCGCGTTTATATTGGTTGAAAGAGGACATCGATTGGCTCCAGAGAGAAATGAGACACATTCGATCATATGTAGA |  |                                                      |
| MH297492_51-660            | (101) | CTGCAAAATCTACTCTTTCAAGAAGGTACCGCGTTTATATTGGTTGAAAGAGGACATCGATTGGCTCCAGAGAGAAATGAGACACATTCGATCATATGTAGA |  |                                                      |
| Consensus                  | (103) | CTGCAAAATCTACTCTTTCAAGAAGGTACCGCGTTTATATTGGTTGAAAGAGGACATCGATTGGCTCCAGAGAGAAATGAGACACATTCGATCATATGTAGA |  |                                                      |
|                            |       | 203                                                                                                    |  | 302                                                  |
| CP047560_59492023-59491423 | (196) | CAATGCAAGGCAAGGAAGTTGGAGGCGATTCAAGGGTAAAAAAGTTAT                                                       |  | TAAAAAGATATTCAACAACATGGCAGGTGATGTGGAGGATCTATTAGATGAG |
| GU338312_89-700            | (203) | CAATGCAAGGCAAGGAAGTTGGAGGCGATTCAAGGGTAAAAAAGTTAT                                                       |  | TAAAAAGATATTCAACAACATGGCAGGTGATGTGGAGGATCTATTAGATGAG |
| Hybrid_13/11               | (201) | CAATGCAAGGCAAGGAAGTTGGAGGCGATTCAAGGGTAAAAAAGTTAT                                                       |  | TAAAAAGATATTCAACAACATGGCAGGTGATGTGGAGGATCTATTAGATGAG |
| FJ423044_758-1367          | (203) | CAATGCAAGGCAAGGAAGTTGGAGGCGATTCAAGGGTAAAAAAGTTAT                                                       |  | TAAAAAGATATTCAACAACATGGCAGGTGATGTGGAGGATCTATTAGATGAG |
| FJ423046_91-700            | (201) | CAATGCAAGGCAAGGAAGTTGGAGGCGATTCAAGGGTAAAAAAGTTAT                                                       |  | TAAAAAGATATTCAACAACATGGCAGGTGATGTGGAGGATCTATTAGATGAG |
| MH297492_51-660            | (201) | CAATGCAAGGCAAGGAAGTTGGAGGCGATTCAAGGGTAAAAAAGTTAT                                                       |  | TAAAAAGATATTCAACAACATGGCAGGTGATGTGGAGGATCTATTAGATGAG |
| Consensus                  | (203) | CAATGCAAGGCAAGGAAGTTGGAGGCGATTCAAGGGTAAAAAAGTTAT                                                       |  | TAAAAAGATATTCAACAACATGGCAGGTGATGTGGAGGATCTATTAGATGAG |
|                            |       | 303                                                                                                    |  | 402                                                  |
| CP047560_59492023-59491423 | (296) | TTTCTTCCAAAAATTCACAATCCAATAAGTTCATTGTTGTCCTTAAGAC                                                      |  | GGTTTCTTTTGCCGATGAGTTTGCTATGGAGATTGAGAAGATAAAAAGAA   |
| GU338312_89-700            | (303) | TTTCTTCCAAAAATTCACAATCCAATAAGTTCATTGTTGTCCTTAAGAC                                                      |  | GGTTTCTTTTGCCGATGAGTTTGCTATGGAGATTGAGAAGATAAAAAGAA   |
| Hybrid_13/11               | (301) | TTTCTTCCAAAAATTCACAATCCAATAAGTTCATTGTTGTCCTTAAGAC                                                      |  | GGTTTCTTTTGCCGATGAGTTTGCTATGGAGATTGAGAAGATAAAAAGAA   |
| FJ423044_758-1367          | (303) | TTTCTTCCAAAAATTCACAATCCAATAAGTTCATTGTTGTCCTTAAGAC                                                      |  | GGTTTCTTTTGCCGATGAGTTTGCTATGGAGATTGAGAAGATAAAAAGAA   |
| FJ423046_91-700            | (301) | TTTCTTCCAAAAATTCACAATCCAATAAGTTCATTGTTGTCCTTAAGAC                                                      |  | GGTTTCTTTTGCCGATGAGTTTGCTATGGAGATTGAGAAGATAAAAAGAA   |
| MH297492_51-660            | (301) | TTTCTTCCAAAAATTCACAATCCAATAAGTTCATTGTTGTCCTTAAGAC                                                      |  | GGTTTCTTTTGCCGATGAGTTTGCTATGGAGATTGAGAAGATAAAAAGAA   |
| Consensus                  | (303) | TTTCTTCCAAAAATTCACAATCCAATAAGTTCATTGTTGTCCTTAAGAC                                                      |  | GGTTTCTTTTGCCGATGAGTTTGCTATGGAGATTGAGAAGATAAAAAGAA   |
|                            |       | 403                                                                                                    |  | 502                                                  |
| CP047560_59492023-59491423 | (396) | GAGTTGCTGATATTGACCGGTGAAGGACAACCTTACAGATCAAGTACAAATAGTGATGATTGCATTCCATTGGACCGAGAGAAGATTGTT             |  |                                                      |
| GU338312_89-700            | (403) | GAGTTGCTGATATTGACCGGTGAAGGACAACCTTACAGATCAAGTACAAATAGTGATGATTGCATTCCATTGGACCGAGAGAAGATTGTT             |  |                                                      |
| Hybrid_13/11               | (401) | GAGTTGCTGATATTGACCGGTGAAGGACAACCTTACAGATCAAGTACAAATAGTGATGATTGCATTCCATTGGACCGAGAGAAGATTGTT             |  |                                                      |
| FJ423044_758-1367          | (403) | GAGTTGCTGATATTGACCGGTGAAGGACAACCTTACAGATCAAGTACAAATAGTGATGATTGCATTCCATTGGACCGAGAGAAGATTGTT             |  |                                                      |
| FJ423046_91-700            | (401) | GAGTTGCTGATATTGACCGGTGAAGGACAACCTTACAGATCAAGTACAAATAGTGATGATTGCATTCCATTGGACCGAGAGAAGATTGTT             |  |                                                      |
| MH297492_51-660            | (401) | GAGTTGCTGATATTGACCGGTGAAGGACAACCTTACAGATCAAGTACAAATAGTGATGATTGCATTCCATTGGACCGAGAGAAGATTGTT             |  |                                                      |
| Consensus                  | (403) | GAGTTGCTGATATTGACCGGTGAAGGACAACCTTACAGATCAAGTACAAATAGTGATGATTGCATTCCATTGGACCGAGAGAAGATTGTT             |  |                                                      |
|                            |       | 503                                                                                                    |  | 601                                                  |
| CP047560_59492023-59491423 | (496) | CCTTCATGCTGATGAAACAGAGGTATCGGTTGGGAAGTACTTCAATA                                                        |  | AGCTSCAAGCCAAATTAATTGATCAGATTGTCCTTATGGAGTTGTTTC     |
| GU338312_89-700            | (500) | CCTTCATGCTGATGAAACAGAGGTATCGGTTGGGAAGTACTTCAATA                                                        |  | ACTACAAGCCAAATTAATTGATCAGATTGTCCTTATGGAGTTGTTTC      |
| Hybrid_13/11               | (498) | CCTTCATGCTGATGAAACAGAGGTATCGGTTGGGAAGTACTTCAATA                                                        |  | ACTACAAGCCAAATTAATTGATCAGATTGTCCTTATGGAGTTGTTTC      |
| FJ423044_758-1367          | (500) | CCTTCATGCTGATGAAACAGAGGTATCGGTTGGGAAGTACTTCAATA                                                        |  | ACTACAAGCCAAATTAATTGATCAGATTGTCCTTATGGAGTTGTTTC      |
| FJ423046_91-700            | (498) | CCTTCATGCTGATGAAACAGAGGTATCGGTTGGGAAGTACTTCAATA                                                        |  | ACTACAAGCCAAATTAATTGATCAGATTGTCCTTATGGAGTTGTTTC      |
| MH297492_51-660            | (498) | CCTTCATGCTGATGAAACAGAGGTATCGGTTGGGAAGTACTTCAATA                                                        |  | ACTACAAGCCAAATTAATTGATCAGATTGTCCTTATGGAGTTGTTTC      |
| Consensus                  | (503) | CCTTCATGCTGATGAAACAGAGGTATCGGTTGGGAAGTACTTCAATA                                                        |  | ACTACAAGCCAAATTAATTGATCAGATTGTCCTTATGGAGTTGTTTC      |
|                            |       | 110                                                                                                    |  | 204                                                  |
| ACJ66594_17-219            | (110) | KFICCLKTVSFADEFAMEIEKIKRRVADIDRVRTTYSITDTSNNN-DDCIPLDRRLFLHADETEVIGLEDDFNLLQAKLLDHDLPYGVVSIVGM         |  |                                                      |
| ACJ66596_31-233            | (110) | KFICCLKTVSFADEFAMEIEKIKRRVADIDRVRTTYSITDTSNNN-DDCIPLDRRLFLHADETEVIGLEDDFNLLQAKLLDHDLPYGVVSIVGM         |  |                                                      |
| Hybrid                     | (110) | KFICCLKTVSFADEFAMEIEKIKRRVADIDRVRTTYSITDTSNNN-DDCIPLDRRLFLHADETEVIGLEDDFNLLQAKLLDHDLPYGVVSIVGM         |  |                                                      |
| S. pin                     | (102) | KFICCLKTVSFADEFAMEIEKIKRRVADIDRVRTTYSITDTSNNNSDDCIPLDRRLFLHADEXEVIGLXDDFNLLQAKLLDHDLPYGVVSIVGM         |  |                                                      |
| QAY29223_17-219            | (110) | KFICCLKTVSFADEFAMEIEKIKRRVADIDRVRTTYSITDTSNNN-DDCIPLDRRLFLHADETEVIGLEDDFNLLQAKLLDHDLPYGVVSIVGM         |  |                                                      |
| Consensus                  | (110) | KFICCLKTVSFADEFAMEIEKIKRRVADIDRVRTTYSITDTSNNN-DDCIPLDRRLFLHADETEVIGLEDDFNLLQAKLLDHDLPYGVVSIVGM         |  |                                                      |

Supplemental Fig. 1A. Alignment of *Rpi-vnt1* homologs. Hybrid 13/11, amplicon sequence from clone 13/11-09; FJ423044, *S. venturii* *Rpi-vnt1.1* gene; FJ423046, *S. venturii* *Rpi-vnt1.3* gene; MH297492, *S. tuberosum* cv. Alouette *Rpi-vnt1.3* gene; GU338312, *S. microdontum* ssp. *gigantophyllum* isolate GIG362-4 *rpi-vnt1*-like protein pseudogene; CP047560\_59492023-59491423, *S. pinnatisectum* cv. CGN17745 fragment from chromosome 9.

Supplemental Fig. S1B. Alignment of predicted amino acid sequences of *Rpi-vnt1* protein homologs. Hybrid 13/11; sequence corresponding to the amplicon from clone 13/11-09; ACJ66594, protein *Rpi-vnt1.1* from *S. venturii*; ACJ66596, protein *Rpi-vnt1.3* from *S. venturii*; QAY29223, protein *Rpi-vnt1.3* from *S. tuberosum* cv. Alouette; S.pin, predicted amino acid sequence of the *S. pinnatisectum* cv. CGN177459 chromosome 9 fragment (59492023 to 59491423 bp).
